# Supplementary material for: Cheminformatics Bioprospection of Broad Spectrum Plant Secondary Metabolites Targeting the Spike Proteins of Omicron Variant and Wild-Type SARS-CoV-2
Source: MDPI journal article supplement (doi:10.3390/metabo12100982), 2022-10-17

**Table S1:** Docking scores of 73 LOCM compounds against spike protein of SC-2WT and its omicron variant

| Ligands                                                  | Sar cov2 Spike protein<br>[Binding affinity (Kcal/mol)] | Omicron variant spike protein<br>[Binding affinity (Kcal/mol)] |
|----------------------------------------------------------|---------------------------------------------------------|----------------------------------------------------------------|
| 1. Kaempferol-7-glucoside CID 10095180                   | -7.3                                                    | -6.9                                                           |
| 2. Neophytadiene CID 10446                               | -5.3                                                    | -4.2                                                           |
| 3. Pyrazole CID 1048                                     | -3.1                                                    | -3.1                                                           |
| 4. Isoorientin CID 114776                                | -7.2                                                    | -7                                                             |
| 5. Uracil CID 1174                                       | -4.4                                                    | -4.2                                                           |
| 6. Globulol CID 12304985                                 | -5.5                                                    | -6                                                             |
| 7. Cyanidin CID 128861                                   | -6.7                                                    | -6.3                                                           |
| 8. P-hydroxybenzoic acid CID 135                         | -4.9                                                    | -5.2                                                           |
| 9. Butyl-2-nitropropanoate CID 13781495                  | -4.4                                                    | -4.2                                                           |
| 10. 2,5-dimethyloxazolidine CID 15326616                 | -3.8                                                    | -3.5                                                           |
| 11. Solucritin CID 160505                                | -5.6                                                    | -5.8                                                           |
| 12. Chlorogenic acid CID 1794427                         | -7.1                                                    | -6.1                                                           |
| 13. 5-dimethyl-4-hydroxy-3 (2H)-<br>furanone3D CID 19309 | -4.2                                                    | -4.4                                                           |
| 14. Benzene propanoic acid CID 20569239                  | -5.4                                                    | -5.2                                                           |
| 15. Helenalin CID 23205                                  | -5.7                                                    | -6.6                                                           |
| 16. Bastadin CID 23426999                                | -8.1                                                    | -7.7                                                           |
| 17. 5-hydroxymethylfurfural CID 237332                   | -4.6                                                    | -4.5                                                           |
| 18. 4-mercaptophenol3D CID 240147                        | -4.3                                                    | -4.3                                                           |
| 19. Benzoic acid CID 243                                 | -4.6                                                    | -5.3                                                           |
| 20. Aureonitol CID 25064137                              | -5.6                                                    | -4.8                                                           |
| 21. 1-Tridecanal CID 25311                               | -4.9                                                    | -4.1                                                           |
| 22. Hexadecanol CID 2682                                 | -4.9                                                    | -3.9                                                           |
| 23. 1,2,4,5-Tetrazine-3,6-diamine CID 283379             | -4.3                                                    | -4.5                                                           |
| 24. Phosphonous acid CID 3014827                         | -2.4                                                    | -2.5                                                           |
| 25. eugenol CID 3314                                     | -5.2                                                    | -5.3                                                           |
| 26. Xylocaine CID 3676                                   | -5                                                      | -5.4                                                           |
| 27. 2-Galactopyranose CID 439804                         | -4.7                                                    | -5                                                             |
| 28. Pelargonidin CID 440832                              | -6.3                                                    | -6.4                                                           |
| 29. Luteolinidin CID 441701                              | -6.8                                                    | -6.3                                                           |
| 30. 6-Hydroxycyanidin-3-3D CID 44257027                  | -7.2                                                    | -7.2                                                           |
| 31. Cinnamic acid CID 444539                             | -5.2                                                    | -5.4                                                           |
| 32. farnesol CID 445070                                  | -6.1                                                    | -4.8                                                           |
| 33. Cyanindin-3-glucoside CID 4481259                    | -6.6                                                    | -6.6                                                           |
| 34. kaur-16-ene CID 520687                               | -6.4                                                    | -7.2                                                           |
| 35. 1,3,5-Triazine-2,4,6-triamine3D CID 5250297          | -4.5                                                    | -4.8                                                           |
| 36. Phytol3D CID 5280435                                 | -5.4                                                    | -4.5                                                           |
| 37. Apigenin CID 5280443                                 | -6.6                                                    | -6.7                                                           |
| 38. Luteolin CID 5280445                                 | -6.7                                                    | -6.4                                                           |
| 39. Cistanoside C CID 5315929                            | -7.1                                                    | -6.7                                                           |
| 40. Cistanoside D CID 5315930                            | -6.8                                                    | -6.3                                                           |
| 41. Geraniin CID 5317050                                 | -7.1                                                    | -7.5                                                           |
| 42. 9,17-octadecadienal CID 5365667                      | -5.2                                                    | -4                                                             |
| 43. 2,5-difluorophenylhydrazine CID 588957               | -4.9                                                    | -5.2                                                           |
| 44. D-Galactopyranose CID 6036                           | -4.7                                                    | -5                                                             |
| 45. 1,2-ethenediamine CID 6066279                        | -2.5                                                    | -2.6                                                           |
| 46. 3,5-dimethyl-1H-pyrazole CID 6210                    | -4                                                      | -4                                                             |
| 47. 2-Hydroxycinnamic acid CID 637540                    | -5.2                                                    | -5.5                                                           |
| 48. Hydroxycinnamic acid CID 637542                      | -5.1                                                    | -5.6                                                           |
| 49. cis-sabinene hydrate CID 6427493                     | -5.2                                                    | -5.4                                                           |

|                                          |      |      |
|------------------------------------------|------|------|
| 50. Trans-pinocamphone CID 6430551       | -5.1 | -5.2 |
| 51. Epigallocatechin gallate CID 65064   | -6.9 | -7.2 |
| 52. Acrylic acid CID 6581                | -3.4 | -3.1 |
| 53. Pinocembrin CID 68071                | -6.2 | -6.9 |
| 54. Hordenine CID 68313                  | -4.8 | -5   |
| 55. Thymol CID 6989                      | -5.2 | -5.2 |
| 56. 2-methyl-napthalene3D CID 7055       | -5.6 | -6.2 |
| 57. Maysin CID 70698181                  | -8.4 | -7.5 |
| 58. Isoflavone CID 72304                 | -6.6 | -6.2 |
| 59. 3-pentanone CID 7288                 | -3.4 | -3.3 |
| 60. Furfural CID 7362                    | -4   | -3.5 |
| 61. citronellol CID 7793                 | -4.7 | -4.2 |
| 62. 4H-pyran-4-one CID 7968              | -3.6 | -3.4 |
| 63. Isopropyl myristate CID 8042         | -5.2 | -4.3 |
| 64. O-diethyl phthalate CID 8554         | -4.9 | -5.4 |
| 65. Hexanoic acid CID 8892               | -4.3 | -4   |
| 66. T-butylthiothioacetic acid CID 90460 | -4.1 | -3.9 |
| 67. Catalpol CID 91520                   | -6.3 | -6.5 |
| 68. Indolizine CID 9230                  | -4.5 | -4.8 |
| 69. Ledol CID 92812                      | -5.6 | -6.3 |
| 70. Catalposide CID 93039                | -7.4 | -6.8 |
| 71. Naringenin CID 932                   | -6.3 | -6.7 |
| 72. Palmitic acid CID 985                | -5.3 | -4.2 |
| 73. Phenol CID 996                       | -4.3 | -4.4 |
| Controls                                 |      |      |
| Zafirlukast                              | -7.9 | -7.4 |
| Cefoperazone                             | -6.7 | -6.2 |

**Table S2:** 2D interaction plots of top five LOCM compounds against SP of omicron and SC-2WT after 100 ns simulation

| Complex                        | 2D interactions                                                                                                                                                                   |
|--------------------------------|-----------------------------------------------------------------------------------------------------------------------------------------------------------------------------------|
|                                | Omicron                                                                                                                                                                           |
| 6-Hydroxycyanidin 3-rutinoside | <p><b>Interactions</b></p> <ul style="list-style-type: none"> <li>van der Waals</li> <li>Conventional Hydrogen Bond</li> <li>Unfavorable Donor-Donor</li> <li>Pi-Alkyl</li> </ul> |

Epigallocatechin gallate

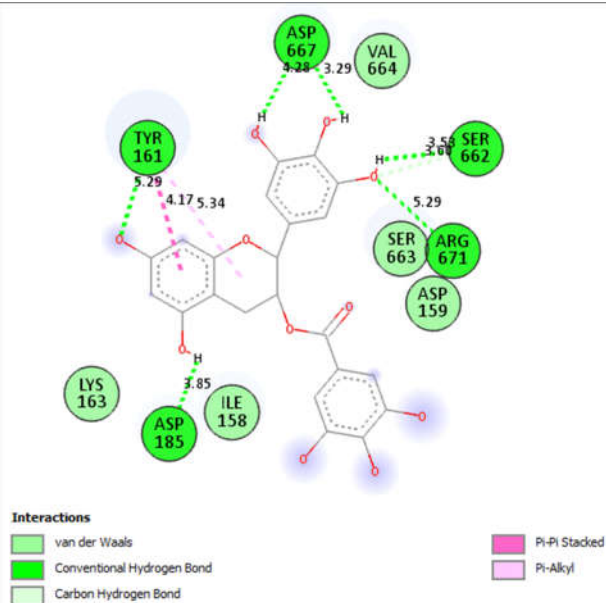

Geraniin

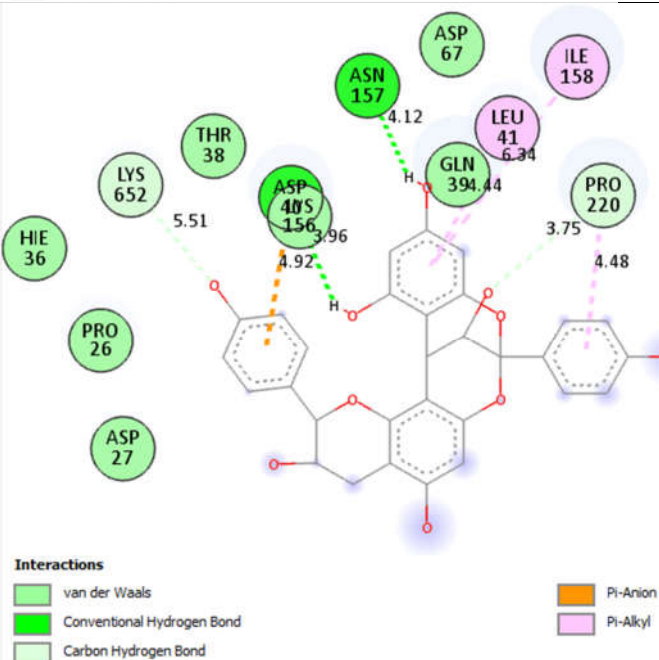

Kaempferol-7-glucoside

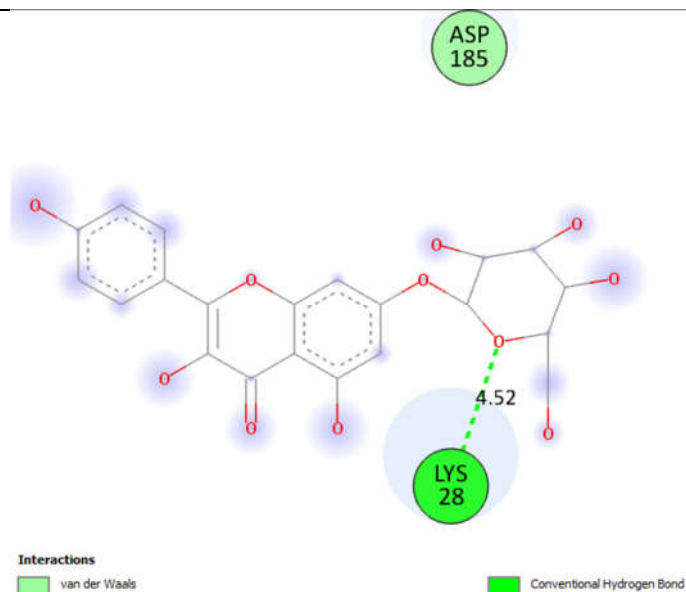

Maysin

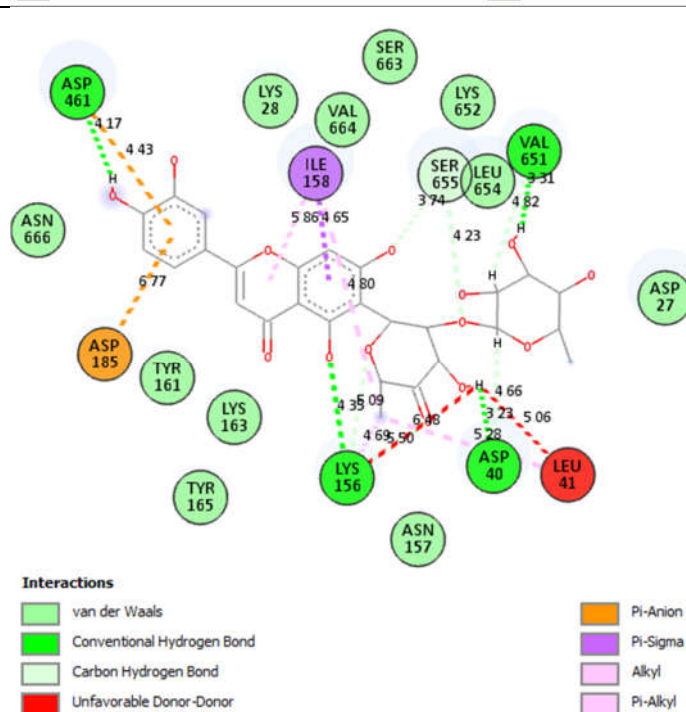

Zafirlukast

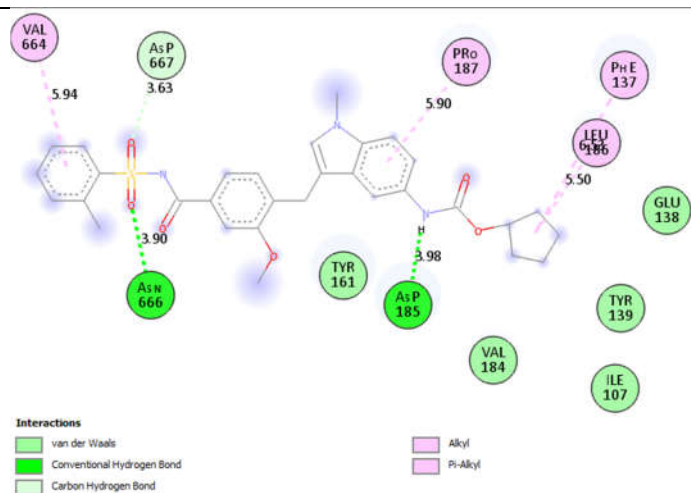

SARS-CoV-2

6-Hydroxycyanidin 3-rutinoside

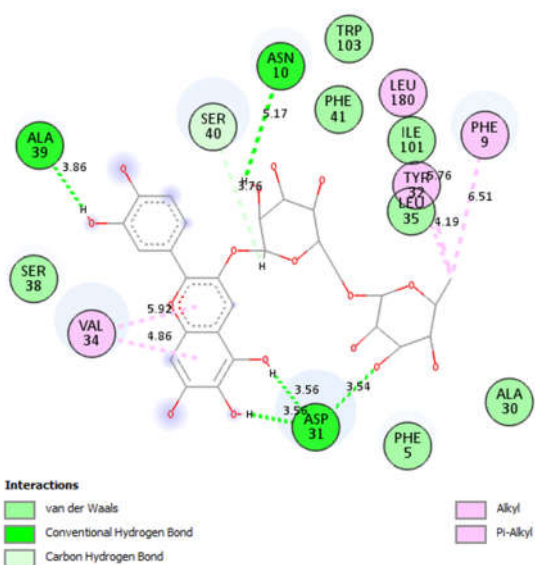

---

Catalposide

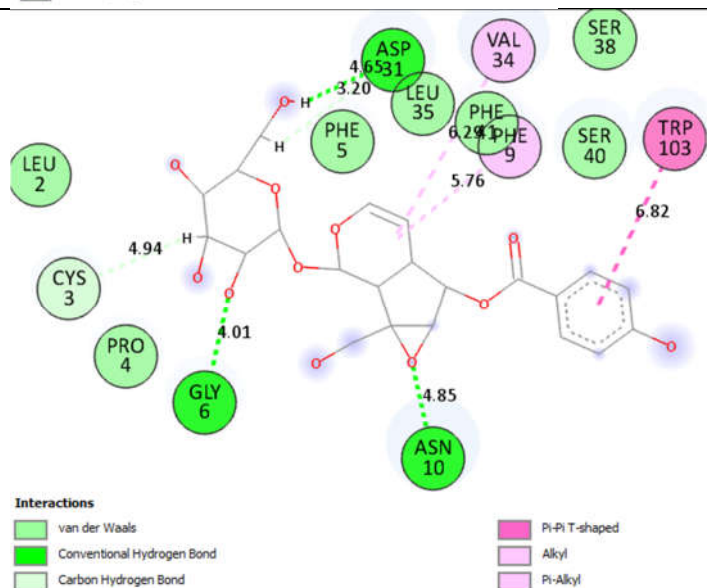

Geraniin

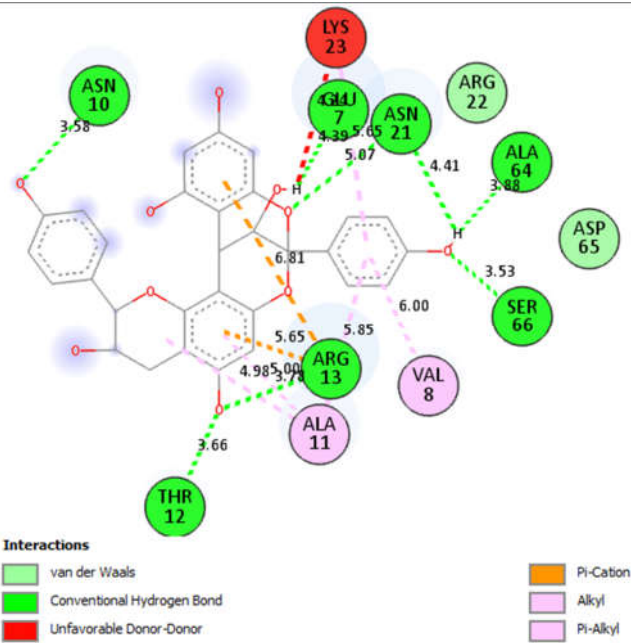

Kaempferol-7-glucoside

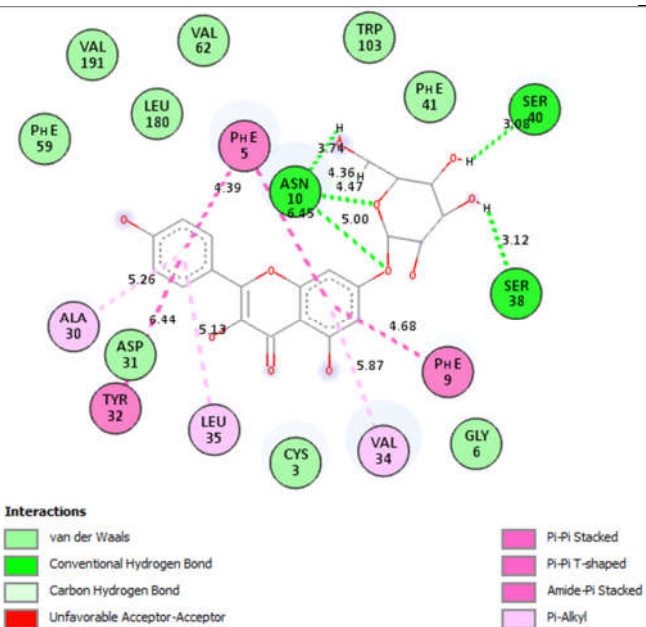

Maysin

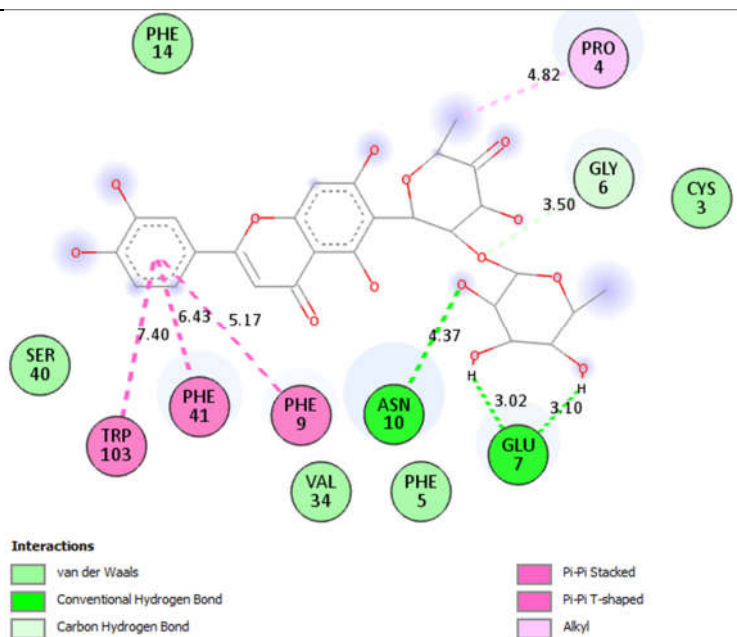

Zafirlukast

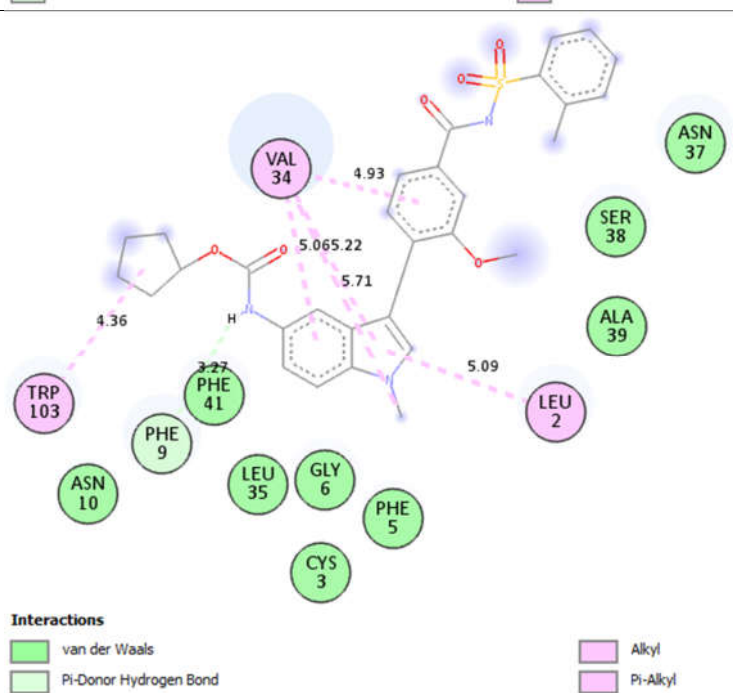

Supplement: s1 [file s1]
